# Supplementary material for: m-Terphenyl-modified carbazole host material for highly efficient blue and green PHOLEDS
Source: Royal Society of Chemistry journal article supplement (doi:10.1039/b908139a), 2009-01-01
Supplement: b908139a.pdf [file b908139a.pdf]

## ***m*-Terphenyl-modified carbazole host material for highly efficient blue and green PHOLEDs**

Hisahiro Sasabe, Yong-Jin Pu, Ken-ichi Nakayama and Junji Kido\*

*Department of Organic Device Engineering, Yamagata University, 4-3-16 Jonan, Yonezawa, Yamagata 992-8510, Japan.*

**General Procedures.** The optimized structures and single-point energies were calculated by Gaussian03<sup>1</sup> at the RB3LYP 6-31G(d) and 6-311+G(d,p) levels for the ground state, and at the UB3LYP 6-31G(d) and 6-311+G(d,p) levels for the excited triplet state respectively. The  $E_{\text{T1}}$  energies of CzTP, mCP and CBP were calculated by using the reported method.<sup>2</sup> <sup>1</sup>H NMR spectrum was recorded on JEOL 400 (400 MHz) spectrometer. Mass spectrum was obtained using a JEOL JMS-K9 mass spectrometer. Differential scanning calorimetry (DSC) was performed using a Perkin-Elmer Diamond DSC Pyris instrument under nitrogen atmosphere at a heating rate of 10°C min<sup>-1</sup>. Thermogravimetric analysis (TGA) was undertaken using a SEIKO EXSTAR 6000 TG/DTA 6200 unit under nitrogen atmosphere at a heating rate of 10°C min<sup>-1</sup>. UV-Vis spectra were measured using a Shimadzu UV-3150 UV-vis-NIR spectrophotometer. Photoluminescence spectra were measured using a FluroMax-2 (Jobin-Yvon-Spex) luminescence spectrometer. HOMO levels were determined by atmospheric photoelectron spectroscopy (AC-3, Riken Keiki Co.). The phosphorescent spectra were measured by using a streak camera (C4334 from Hamamatsu Photonics) at 4.2 K. The current density–luminance–voltage characteristics of the OLEDs were measured by Keithley source meter 2400 and Konica Minolta CS-200, respectively. Electroluminescence (EL) spectra were taken by an optical mutichannel analyzer, Hamamatsu PMA 11.

(1) M. J. Frisch et al. Gaussian 03; Gaussian Inc.: Pittsburgh, PA 2003.

(2) P. Marsal, I. Avilov, D. A. da Silva Filho, J. L. Brédas and D. Beljonne, *Chem. Phys. Lett.* 2004, **392**, 521.

**Data for CzTP:** colorless solid; <sup>1</sup>H NMR (400 MHz, CDCl<sub>3</sub>):  $\delta$  8.52 (d,  $J$ =1.4 Hz, 2H), 7.93 (d,  $J$ =1.8 Hz, 4H), 7.80–7.74 (m, 12H), 7.66–7.64 (m, 4H), 7.54–7.47 (m, 11H), 7.41–7.37 (m, 4H) ppm; MS:  $m/z$  700 [M]<sup>+</sup>; Anal. Calcd for C<sub>54</sub>H<sub>37</sub>N: C, 92.67; H, 5.33; N, 2.00%. Found: C, 92.73; H, 5.27; N, 1.95%; UV-vis (film):  $\lambda_{\text{max}}$  = 262, 305 nm; PL (film):  $\lambda_{\text{max}}$  = 395 nm.

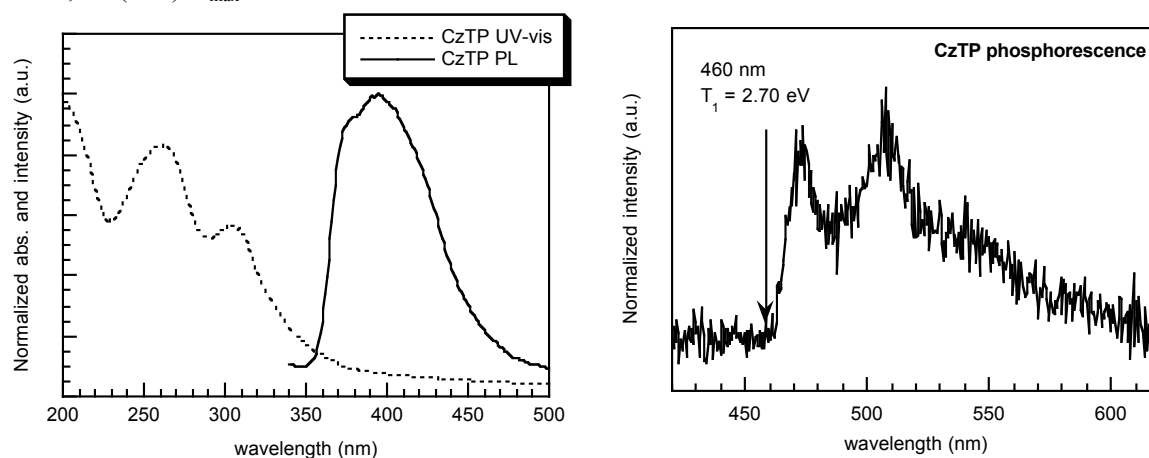

**Figure S-1.** UV-vis and PL spectra of vacuum deposited film of CzTP (left). Phosphorescent spectrum of vacuum-deposited film of CzTP at 4.2 K, measured by streak camera with a N<sub>2</sub> gas laser (337 nm) as an excitation light (right).

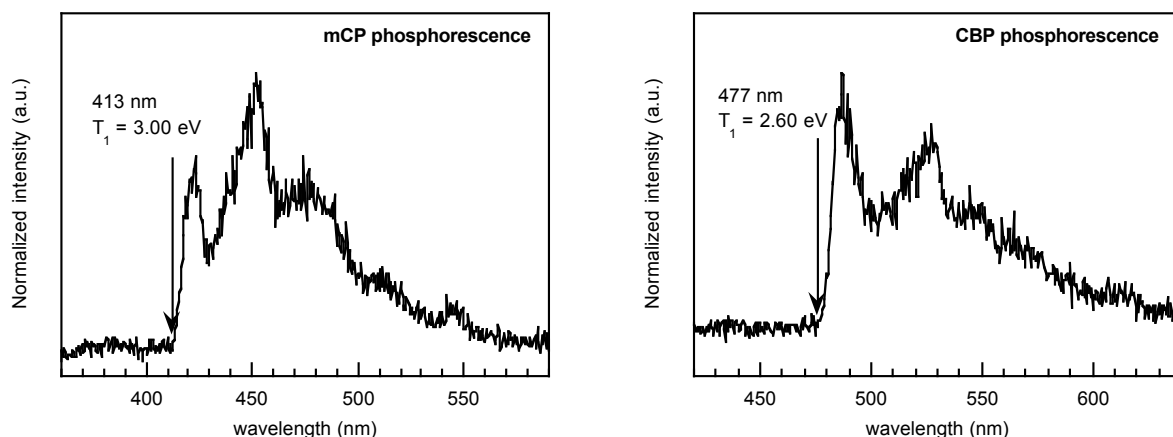

**Figure S-2.** Phosphorescent spectra of vacuum-deposited film of mCP (left) and CBP (right) at 4.2 K, measured by streak camera with a N<sub>2</sub> gas laser (337 nm) as an excitation light.

**Table S-1.** HOMO, LUMO,  $E_g$ ,  $E_{T1}$  and  $\Delta E_{ST}$  energies of materials.

| Compound            | HOMO/eV <sup>a</sup> | LUMO/eV <sup>b</sup> | $E_g$ /eV <sup>c</sup> | $E_{T1}$ /eV (onset) <sup>d</sup> | $E_{T1}$ /eV (first peak) <sup>d</sup> | $\Delta E_{ST}$ /eV <sup>e</sup> |
|---------------------|----------------------|----------------------|------------------------|-----------------------------------|----------------------------------------|----------------------------------|
| CzTP                | 5.91                 | 2.48                 | 3.43                   | 2.70                              | 2.63                                   | 0.73                             |
| mCP                 | 6.09                 | 2.60                 | 3.49                   | 3.00                              | 2.95                                   | 0.49                             |
| CBP                 | 6.10                 | 2.66                 | 3.44                   | 2.60                              | 2.55                                   | 0.84                             |
| TmPyPB <sup>3</sup> | 6.68                 | 2.73                 | 3.95                   | 2.78                              | —                                      | 1.17                             |
| B3PyPB <sup>4</sup> | 6.67                 | 2.62                 | 4.05                   | 2.77                              | 2.67                                   | 1.28                             |

<sup>a</sup>Measured by atmospheric photoelectron spectroscopy (AC-3). <sup>b</sup>Calculated using HOMO and  $E_g$  values. <sup>c</sup>Taken as the point of intersection of the normalized absorption spectra. <sup>d</sup>Measured by using a streak camera (C4334 from Hamamatsu Photonics) at 4.2 K. <sup>e</sup> $\Delta E_{ST} = E_g - E_{T1}$  (onset).

(3) S.-J. Su, T. Chiba, T. Takeda and J. Kido, *Adv. Mater.* 2008, **20**, 2125.

(4) H. Sasabe, E. Gonmori, T. Chiba, Y.-J. Li, D. Tanaka, S.-J. Su, T. Takeda, Y.-J. Pu, K. Nakayama and J. Kido, *Chem. Mater.* 2008, **20**, 5951.

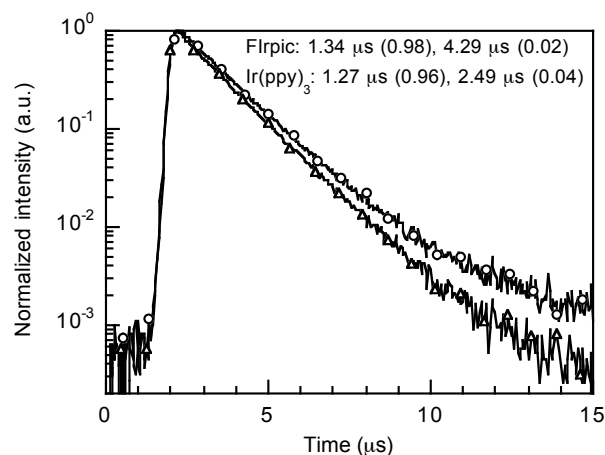

**Figure S-3.** Transient photoluminescence decay curves of CzTP/Flrpic film (circles) and CzTP/Ir(ppy)<sub>3</sub> film (triangles) at room temperature.
